# Supplementary material
Source: PubMed Central journal article supplement (PMC3731395)
Supplement: NIHMS457091-supplement-Supp_Table_S1-S2.pdf [file NIHMS457091-supplement-Supp_Table_S1-S2.pdf]

SUPPLEMENTARY MATERIAL FOR

Genetic Associations of Psoriasis in a Pakistani Population

P.A. Shaiq<sup>1</sup>, P.E. Stuart<sup>2</sup>, A. Latif<sup>3</sup>, C. Schmotzer<sup>3</sup>, A. H. Kazmi<sup>4</sup>, M. S. Khan<sup>5</sup>, M. Azam<sup>6</sup>, T. Tejasvi<sup>2</sup>, J.J. Voorhees<sup>2</sup>, G.K. Raja<sup>1</sup>, J.T. Elder<sup>2,7</sup>, R. Qamar<sup>5,6</sup>, R.P. Nair<sup>2</sup>

<sup>1</sup>PMAS-Arid Agriculture University Rawalpindi, Rawalpindi, Pakistan

<sup>2</sup>Department of Dermatology, University of Michigan, Ann Arbor, MI, U.S.A.

<sup>3</sup>Rawalpindi Leprosy Hospital, Rawalpindi, Pakistan

<sup>4</sup>Mayo Hospital, Lahore, Pakistan

<sup>5</sup>Shifa College of Medicine, Shifa Tameer-e-Millat University, Islamabad, Pakistan

<sup>6</sup>COMSATS Institute of Information Technology, Islamabad, Pakistan

<sup>7</sup>Ann Arbor Veterans Affairs Hospital, Ann Arbor, MI, U.S.A.

Table S1. Clinical characteristics of the Pakistani psoriasis cases

| Variable (unit)                   | sample size | mean $\pm$ standard error |
|-----------------------------------|-------------|---------------------------|
| male (%)                          | 351         | 59.0 $\pm$ 2.6            |
| age at exam (years)               | 351         | 35.4 $\pm$ 0.8            |
| age at onset of psoriasis (years) | 349         | 29.6 $\pm$ 0.7            |
| family history (%)                | 200         | 28.0 $\pm$ 3.2            |
| psoriatic arthritis (%)           | 200         | 4.0 $\pm$ 1.4             |

Table S2. Comparison of risk allele frequencies in Pakistan vs. population of disease locus discovery for 30 markers in 24 known psoriasis susceptibility loci.

| Candidate Gene(s)    | Marker <sup>1</sup> | Risk allele <sup>2</sup> | Frequency of risk allele <sup>3</sup> |                      |        |        | P value <sup>4</sup> |
|----------------------|---------------------|--------------------------|---------------------------------------|----------------------|--------|--------|----------------------|
|                      |                     |                          | Pakistan                              | Discovery Population |        |        |                      |
|                      |                     |                          |                                       | Europe               | China  | Japan  |                      |
| <i>IL28RA</i>        | rs4649203           | A                        | 0.6865                                | 0.7282               | —      | —      | 5.5E-02              |
| <i>IL23R/STAT2</i>   | rs2201841           | G                        | 0.5083                                | 0.2942               | —      | —      | 3.5E-20              |
| <i>IL23R/STAT2</i>   | rs11209026          | G                        | 0.9789                                | 0.9393               | —      | —      | 1.5E-05              |
| <i>LCE3B/LCE3B</i>   | LCE3C_LCE3B-del     | del                      | 0.6430                                | 0.6486               | —      | —      | 7.2E-01              |
| <i>REL</i>           | rs702873            | G                        | 0.7528                                | 0.8443               | —      | —      | 1.7E-06              |
| <i>IFIH1</i>         | rs17716942          | A                        | 0.9453                                | 0.8443               | —      | —      | 1.1E-12              |
| <i>ERAP1</i>         | rs27524             | A                        | 0.4081                                | 0.3483               | —      | —      | 9.7E-03              |
| <i>ERAP1</i>         | rs151823            | A                        | 0.1498                                | —                    | 0.4695 | —      | 9.0E-35              |
| <i>IL13/IL4</i>      | rs20541             | G                        | 0.6934                                | 0.7744               | —      | —      | 1.3E-04              |
| <i>TNIP1</i>         | rs17728338          | A                        | 0.1091                                | 0.0699               | —      | —      | 4.3E-03              |
| <i>IL12B</i>         | rs2082412           | G                        | 0.6865                                | 0.7770               | —      | —      | 1.7E-05              |
| <i>IL12B</i>         | rs3212227           | A                        | 0.6845                                | 0.2203               | —      | —      | 6.6E-06              |
| <i>IL12B</i>         | rs4379175           | C                        | 0.6888                                | 0.6570               | —      | —      | 1.6E-01              |
| <i>PTTG1</i>         | rs2431697           | C                        | 0.4505                                | 0.4195               | —      | —      | 2.0E-01              |
| <i>HLA-C</i>         | 7 SNPs              | HLA-Cw6                  | 0.1260                                | 0.0898               | —      | —      | 5.2E-04              |
| <i>HLA-C</i>         | rs1131151           | HLA-Cw1                  | 0.0290                                | —                    | —      | 0.1348 | 6.1E-08              |
| <i>TRAF3IP2</i>      | rs33980500          | T                        | 0.0689                                | 0.0897               | —      | —      | 1.1E-01              |
| <i>TNFAIP3</i>       | rs610604            | G                        | 0.3241                                | 0.3259               | —      | —      | 9.6E-01              |
| <i>DEFB4/DEFB103</i> | HSPD21              | +cn                      | 4.3322                                | 4.5058               | —      | —      | 5.5E-02              |
| <i>CSMD1</i>         | rs7007032           | C                        | 0.3906                                | —                    | 0.2030 | —      | 6.4E-12              |
| <i>CSMD1</i>         | rs10088247          | C                        | 0.3230                                | —                    | 0.2284 | —      | 1.6E-04              |

|                 |            |   |        |        |        |   |         |
|-----------------|------------|---|--------|--------|--------|---|---------|
| <i>IL23A</i>    | rs2066807  | C | 0.9696 | 0.9288 | —      | — | 7.6E-05 |
| <i>GJB2</i>     | rs3751385  | T | 0.1322 | —      | 0.4365 | — | 2.0E-33 |
| <i>NFKBIA</i>   | rs12586317 | T | 0.7787 | 0.7084 | —      | — | 6.9E-04 |
| <i>FBXL19</i>   | rs10782001 | G | 0.6204 | 0.3549 | —      | — | 2.3E-29 |
| <i>NOS2</i>     | rs4795067  | G | 0.3870 | 0.3575 | —      | — | 2.0E-01 |
| <i>SERPINB8</i> | rs514315   | T | 0.6409 | —      | 0.7437 | — | 1.7E-04 |
| <i>TYK2</i>     | rs12720356 | A | 0.9898 | 0.8997 | —      | — | 7.5E-20 |
| <i>ZNF816A</i>  | rs11084211 | G | 0.5975 | —      | 0.6523 | — | 6.0E-02 |
| <i>RNF114</i>   | rs495337   | C | 0.4490 | 0.5950 | —      | — | 6.9E-10 |

<sup>1</sup>In addition to SNPs that are denoted by their dbSNP rsid, other markers listed include LCE3C\_LCE3B-del, which is a deletion-insertion of 32.2-kb segment encompassing *LCE3C* and *LCE3B* genes; *HLA-Cw6*, which is assayed by seven SNPs in exons 2 and 3 of *HLA-C* (rs28732105, rs1050409, rs1131123, rs1131118, rs1050384, rs17839985, and rs41547419); *HLA-Cw1*, which is uniquely tagged by the A allele of SNP rs1131151 in exon 2 of *HLA-C*; and HSPD21, which is the PRT assay for the beta-defensin CNV described by Aldhous et al. (2010).

<sup>2</sup>Determination of risk allele based on published reports, except for rs4379175, where the positively associated allele in the large Michigan case-control cohort is designated as risk. For HSPD21, an increase in copy number (+cn) is associated with increased risk of psoriasis, and mean copy numbers of the B-defensin CNV are shown instead of allele frequencies (mean computed after fitting of bias-corrected Gaussian mixed model to the distribution of raw copy number estimates).

<sup>3</sup>Risk allele frequencies in Pakistan were estimated from the 545 unaffected Pakistan controls in this study. For the populations where association of the marker with psoriasis was first discovered, estimates of risk allele frequency were estimated primarily from samples in phase 1 (version 3) of the 1000 Genomes project, namely 379 European (GBR, FIN, IBS, TSI), 197 Han Chinese (CHB, CHS), and 89 Japanese (JPT) samples. Risk allele frequencies of the LCE3C\_LCE3B-del indel and HLA-Cw6, as well as copy number for the HSPD21 marker, were estimated from the 2,505 unaffected Michigan controls used in this study, which are all of European ancestry.

<sup>4</sup>For all markers except the HSPD21 CNV, the nominal p-value is shown from a Fisher's exact test of the difference in risk allele frequency between Pakistanis and the discovery population. For HSPD21, the nominal p-value for a randomization version of a two sample t-test with pooled variance for the difference in mean copy number is shown. P-values are color coded: black font indicates a corresponding false discovery rate (FDR) > 0.05, cyan font indicates a corresponding FDR ≤ 0.05 and an absolute difference in allele frequency < 0.10, green font indicates a corresponding FDR ≤ 0.05 and an absolute difference in allele frequency of 0.10–0.20, and red font indicates an FDR ≤ 0.05 and an absolute difference in allele frequency > 0.20.
